# Supplementary material for: Multicopper Oxidase-3 Is a Laccase Associated with the Peritrophic Matrix of Anopheles gambiae
Source: PubMed Central journal article supplement (PMC3313952; doi:10.1371/journal.pone.0033985), 2012-03-27
Supplement: pone.0033985.s001.pdf [file pone.0033985.s001.pdf]

AgMCO3 RGVMSLNRKIPGPTISVCRHDLIVVDITNAMAGTSAAIHWHGLHQRATPYMDGVPFITQC 60  
 AaMCO3 RGVMSINRQVPGPAIQVCKDDLIVVDMTNAMGGTATAMHWHGLHQRDTPHMDGVPFVFTQC 60  
 CqMCO3 RGVMSINRQIPGPPIQVCKDDLIVVDMMNAMGGTATAMHWHGLHQRDTPYMDGVPFVFTQC 60  
 ScFet3 RPVITCNGQFPWPDITVNVKGDVRVQIYLTVNGMNNNTNTSMHFHGLFQNGTASMDGVPFLTQC 60  
 \* \*:: \* : \* \* \* \* : \* : : : \* . \* . \* ::\*:\*\*\*. \* . \* . \*\*\*\*\*:\*\*\*

AgMCO3 PIGFGNTFRYAFLAT-EPGTQFYHSHSGHHKVNNGHYGALIVREPKRVDPNGDLYHYDTPA 119  
 AaMCO3 PIEFMSTFRYAFWAT-EPGTQFYHSHAGHHKVNNGHYGAMIIRQPEVNDPNAKLYDFDLPE 119  
 CqMCO3 PIEFMSTFRYSFWAT-EPGTQFYHSHAGHHKVNNGHYGAMIIRQPEANDPNAHLYDFDLPD 119  
 ScFet3 PIAPGSTMLYNFTVDYNVGTYWYHSHTDGOYEDGMKGLFIKID-----DSFPDYDEEL 114  
 \*\* . \* : \* \* . : \*\* :\*\*\*\*: . : : \* \* :\*::: : . \* . : \*

AgMCO3 HVILGSDWMRIDGEMFMPGLPSAGGIMPINLLINGKGTYHDPKKNETTQTPLEVYTVRRG 179  
 AaMCO3 HLIVASDWMHVDGEMYPGLPNGDGILPVNLLINGRGTWLKHNGN-RTNAPREVYRVRKG 178  
 CqMCO3 HTILGSDWMHVDGEMFMPGLPSSGGILPKNLLINGKGTYYTYENGT-TTNAPRDVFRVRKG 178  
 ScFet3 SLSLSEWYHDLVTDLTKSFMS-----VYNPTGAEPIPQNLIVNNTMNLTWVQPD 164  
 : . . : : : : : : : \* \* : : : . : : \* : .

AgMCO3 ARFRFRFINAASHVCPLQLQIEDHMMEVIASDSFHLQPRKVDTLVSTSGERYDFVLEANG 239  
 AaMCO3 GRYRFRFINAASHVCPLQLQIANHTLEIIASDSYNLQPI SANTLVTTSGERYDFVFNADQ 238  
 CqMCO3 GRYRFRFINAASHVCPLQLQIENHPLQIIASDSFNLQPVTVNTLVTTSGERYDFVFNADQ 238  
 ScFet3 TTYLLRIVNVGGFVS-QYFWIEDHEMTVVEIDGITTEKNVTDMLYITVAQRYTVLVHTKN 223  
 : :\*:\*. . . . \* . : \* \* : : : \* . : . : \* \* . :\*\* . : : . .

AgMCO3 VKDITYWVRLRSLGPCADLQLEQFAVLRYT--TGPFINDAFPTGAPPTYEEP-FRN VATAN 296  
 AaMCO3 PTDDYWIRLRAIGPCDYRQISQVAVLSYQPMSPVEEDIAFTDKEIPHYQDQLFLNDVYVN 298  
 CqMCO3 PSANYWIRLRAIGPCDYLNIDQTAVLSYLPFSVPEEELAF TDRELPAFSESLEFDTISAN 298  
 ScFet3 DTDKNFAIMQKFD DMLDVI PSDLQLNATSVMVYNKTAALPTQNYVDSIDN----- 274  
 . : : : . : . \* \* : . : :

AgMCO3 HPNATCGRPEFGDYCITDFQAYD TDEDVINGVDPDHQLTFGFYNYPVVSFESMFESNRYEHY 356  
 AaMCO3 HPNTTCGVSKP-DVCITDFQAYETDDD VINGVDPDMQFILGFENYPMKFEDAFGMGSHEHF 357  
 CqMCO3 HPNTTCGISKP-DVCITDFEAHSRDDSIVNGVDPDKFILGFENYRMTFDKTFGENSHEHF 357  
 ScFet3 -----FLDDFYLQPYEKEA IYGE PDHVITV----- 299  
 : \*\* : . . : \* \*\* : .

AgMCO3 MNIYGSVMMQGAINNISLAYPPFSLLTQPEKIRDDTFCEEDNRPDSCSDRQ-LCTCTHRV 415  
 AaMCO3 MNIHDDIVLQGAINNISFTYPPFSLLTQTDLITEGMFCDEDSWPERCQTRD-HCTCIHRL 416  
 CqMCO3 MNIHDDIVLQGAINNLSFSYPPF SMLTQPELLREDMFCEHTRPAHCDQSDSHCTCIHRL 417  
 ScFet3 -----DVVMDNLKNGVNYAFFNNITYTAP---KVPTLMTVLSSGDQANNSEIYGSNTHTF 351  
 . : : : . \* . : : : . : : : \* .

AgMCO3 KINLGDIVELYILDLTSPVNDLNHPFHLHGYQMFMEMSQDRRVPITL EIAQNIARQRL 475  
 AaMCO3 KIPLHALVELYILDLTPEVNDLNHPFHLHGYQMVMEMGQDRSTPITMERAQKIARRQSL 476  
 CqMCO3 KIELHSLVELYILDLSPDVNPLNHPFHLHGYQMHVMEMGQNLAEPI TIARAQTIARAQSL 477  
 ScFet3 ILEKDEIVEIVLNNQDTGT----HPFHLHGHAFTIQDRDRTYDDALG-EVPHSFDPD--- 403  
 : :\*\* : : . . \*\*\*\*\* : : : . : : : . : :

AgMCO3 SRNTVA-LPPRKDTVSI PSRGYARVRFRADNPGFWLMHCHYEWH TAVGMALVLQVGETSE 534  
 AaMCO3 HRTRVTTMPPKKT VSVPSKGYTRVRVADNPGFWLMHCHYEWH TAVGMVLVLQVGEPTS 536  
 CqMCO3 RRTTVTNFPSPKDTVSI PSKGYTRLRFRADNPGFWLMHCHF EWH TAVGMALVVQVGEPTD 537  
 ScFet3 NHPAFPEYPMRRD TLYVRPQSNFVIRFKADNPGVWFHCHIEWHLLQGLGLVLVEDPFGI 463  
 : . . \* :\*\* : : . . :\*\* \*\*\*\*\* :\*:\*\*\* \*\* \* : \*\* :

AgMCO3 MVKAPADFPKC----- 545  
 AaMCO3 FVKPPAGFP TCNKYTPDV DASL FDA 561  
 CqMCO3 FVRAPANFP TCNKYQPDVDE TMFR- 561  
 ScFet3 QDAHSQLSENHLEVC----- 479  
 . : .
