# Supplementary material for: Multicopper Oxidase-3 Is a Laccase Associated with the Peritrophic Matrix of Anopheles gambiae
Source: PubMed Central journal article supplement (PMC3313952; doi:10.1371/journal.pone.0033985), 2012-03-27

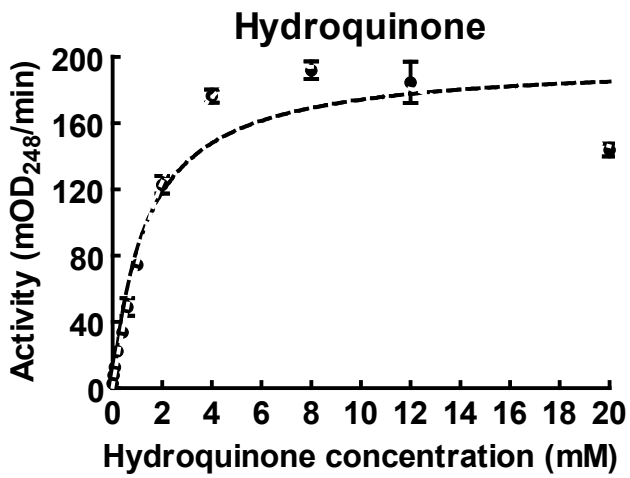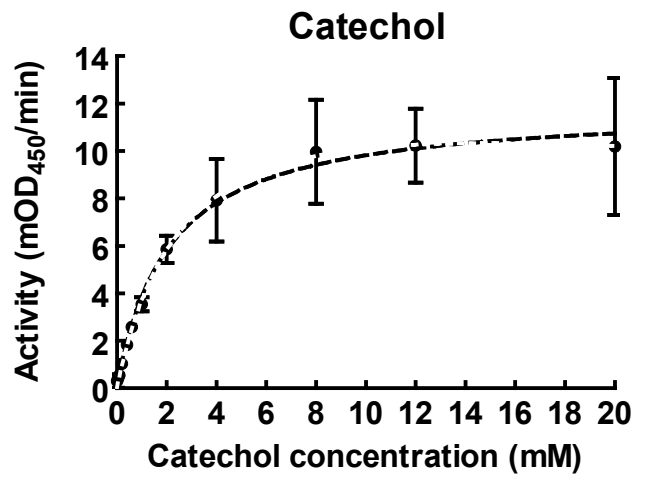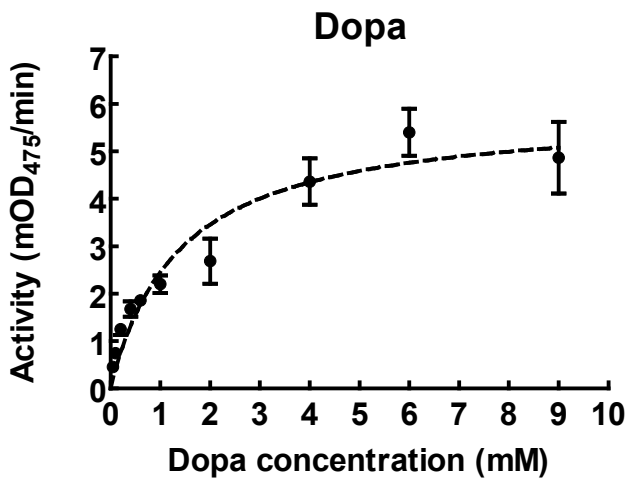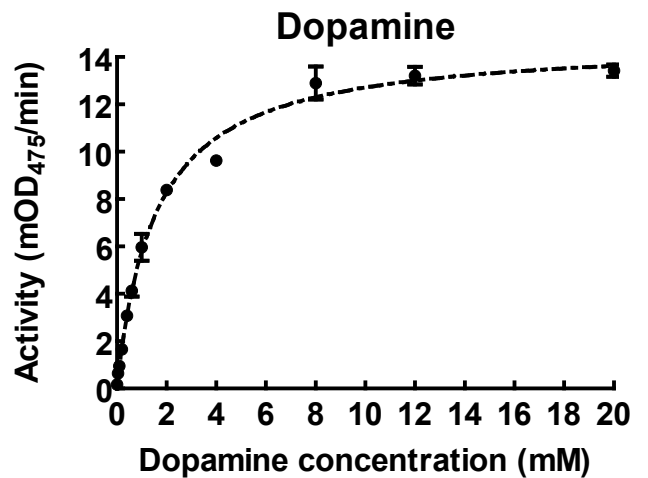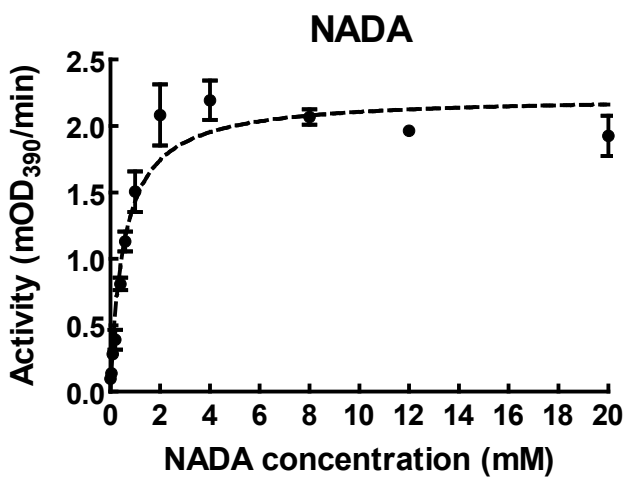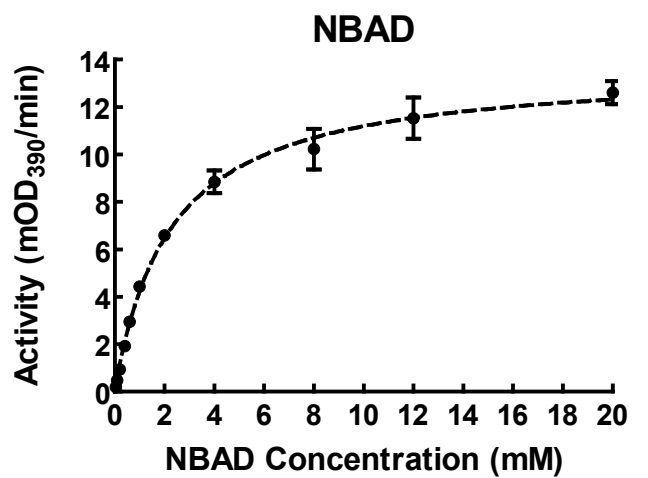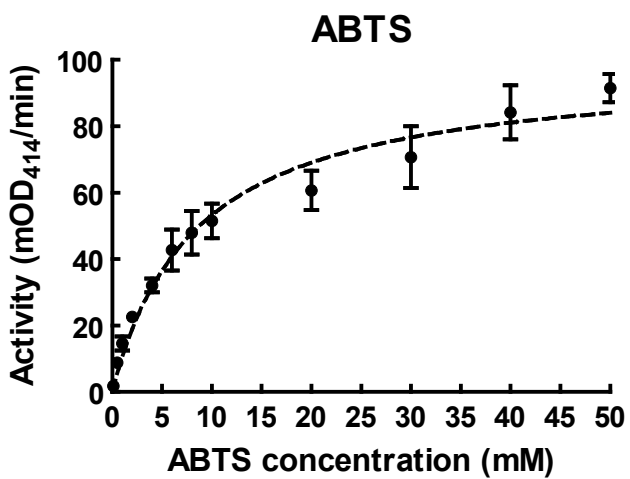

Supplement: pone.0033985.s003.pdf [file pone.0033985.s003.pdf]
